# Supplementary material for: Fine tuning Exo2, a small molecule inhibitor of secretion and retrograde trafficking pathways in mammalian cells
Source: Royal Society of Chemistry journal article supplement (doi:10.1039/c0mb00035c), 2010-08-09

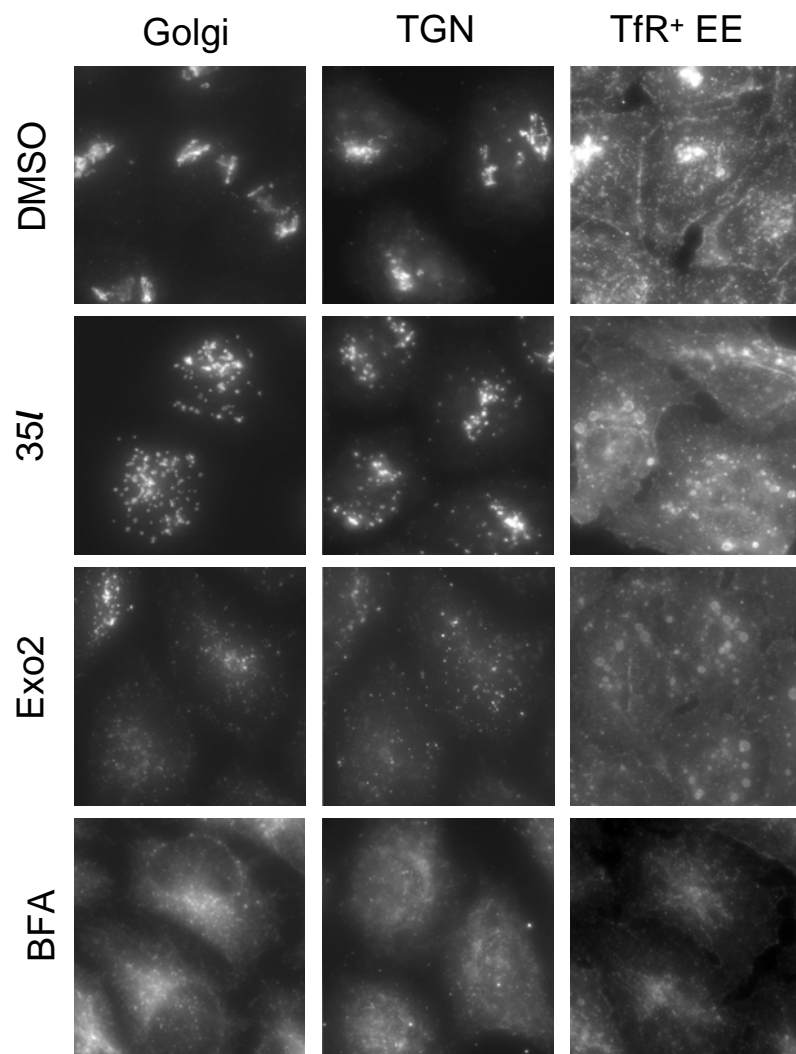

Figure 1S

Chart 1S Protein synthesis for compounds **13,14,15,18** alone and after SLTx challenge

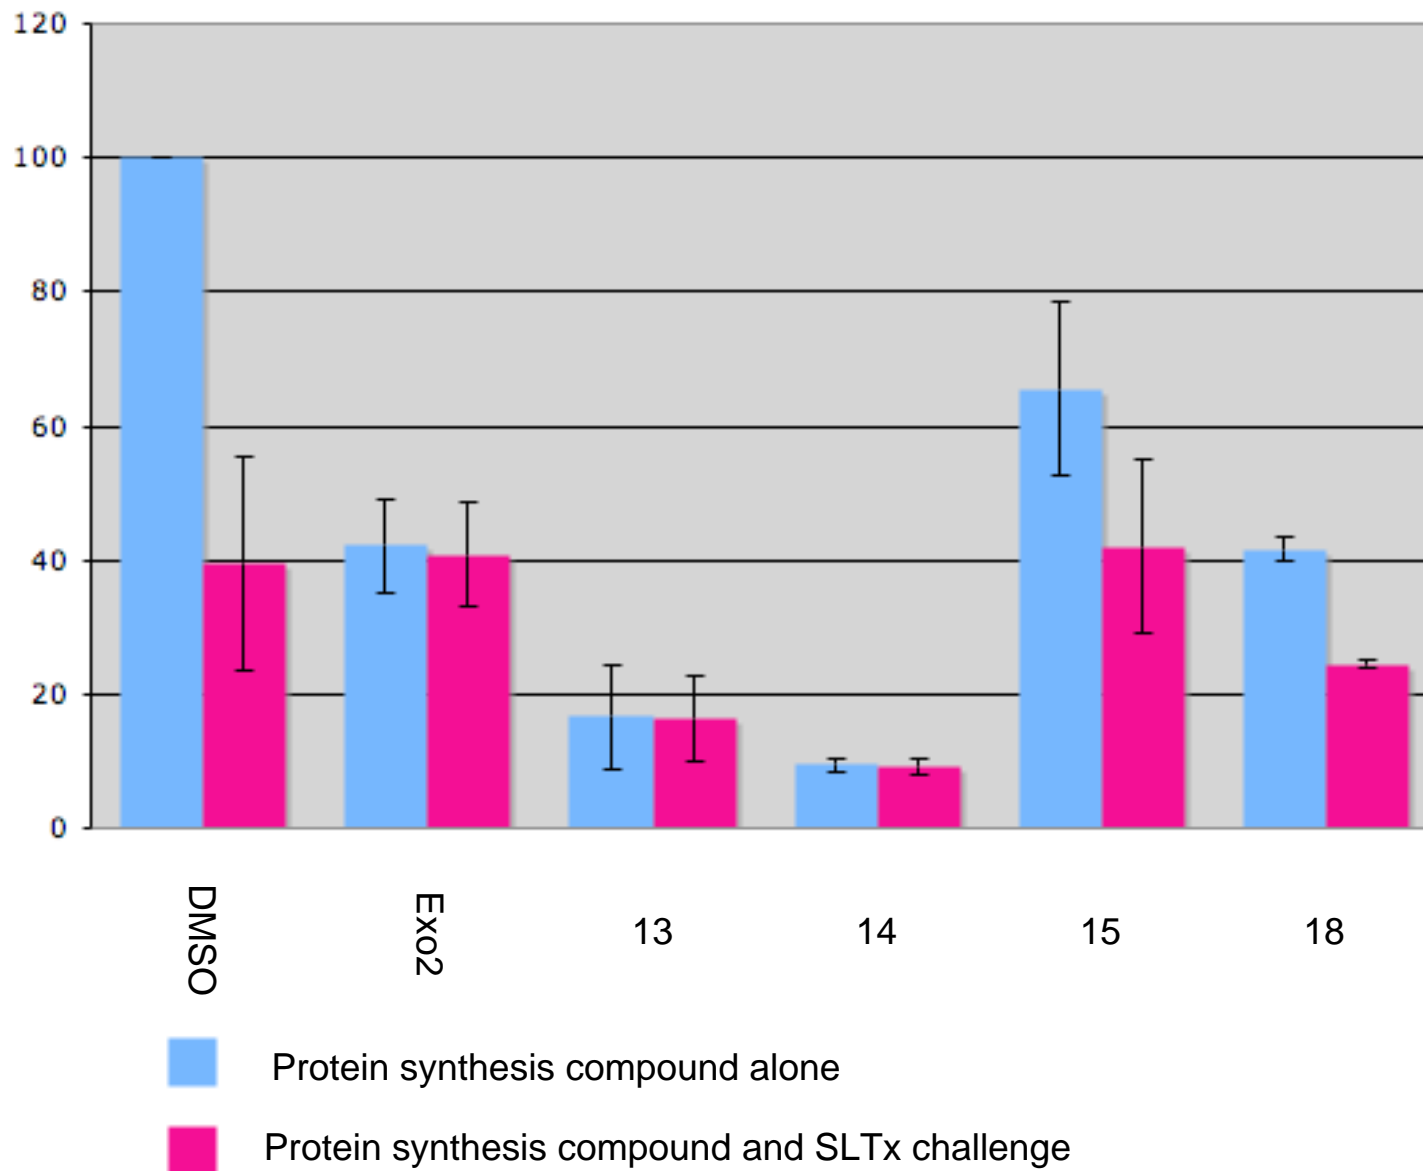

Chart 2S Protein synthesis for compounds **20,30-34** alone and after SLTx challenge

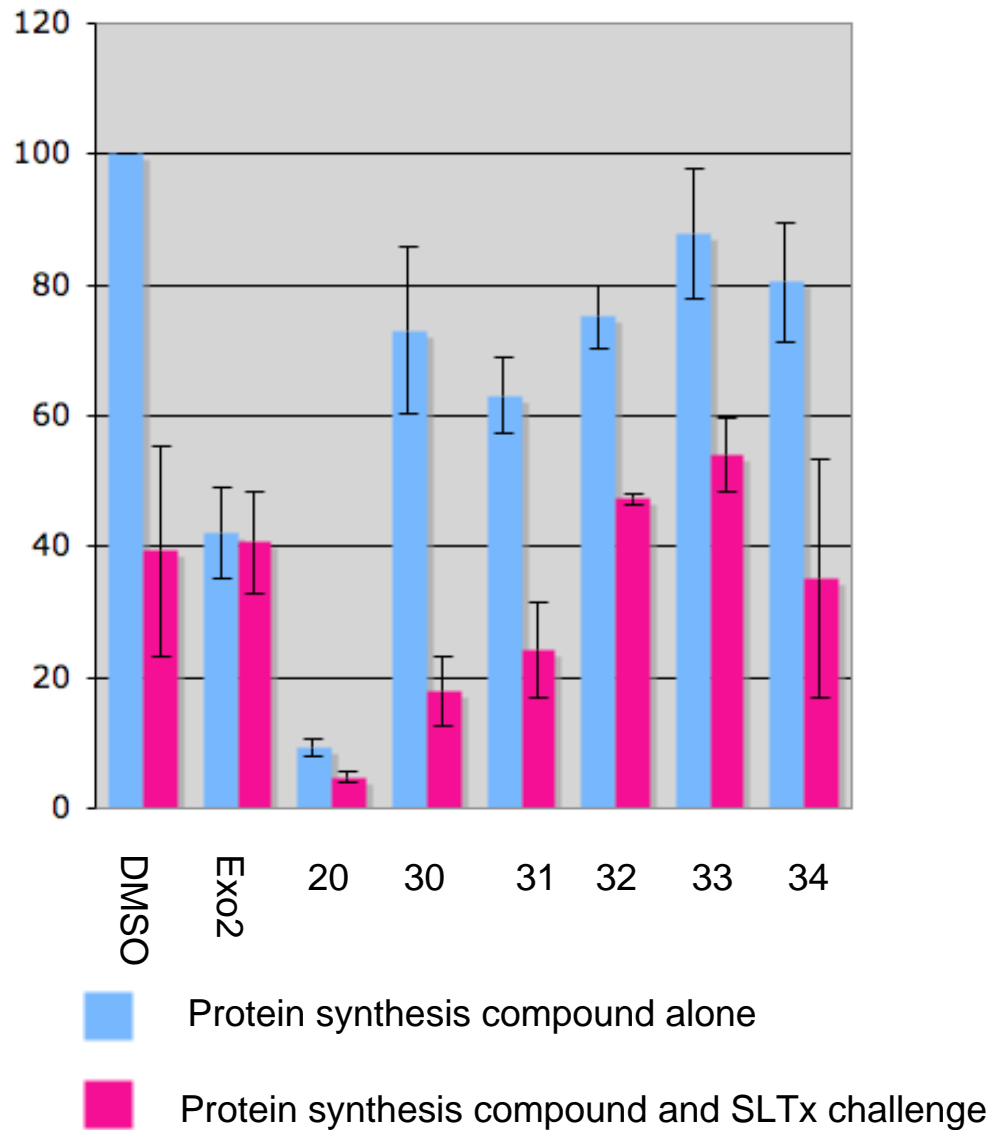

Chart 3S Protein synthesis for compounds 35a-z alone and after SLTx challenge

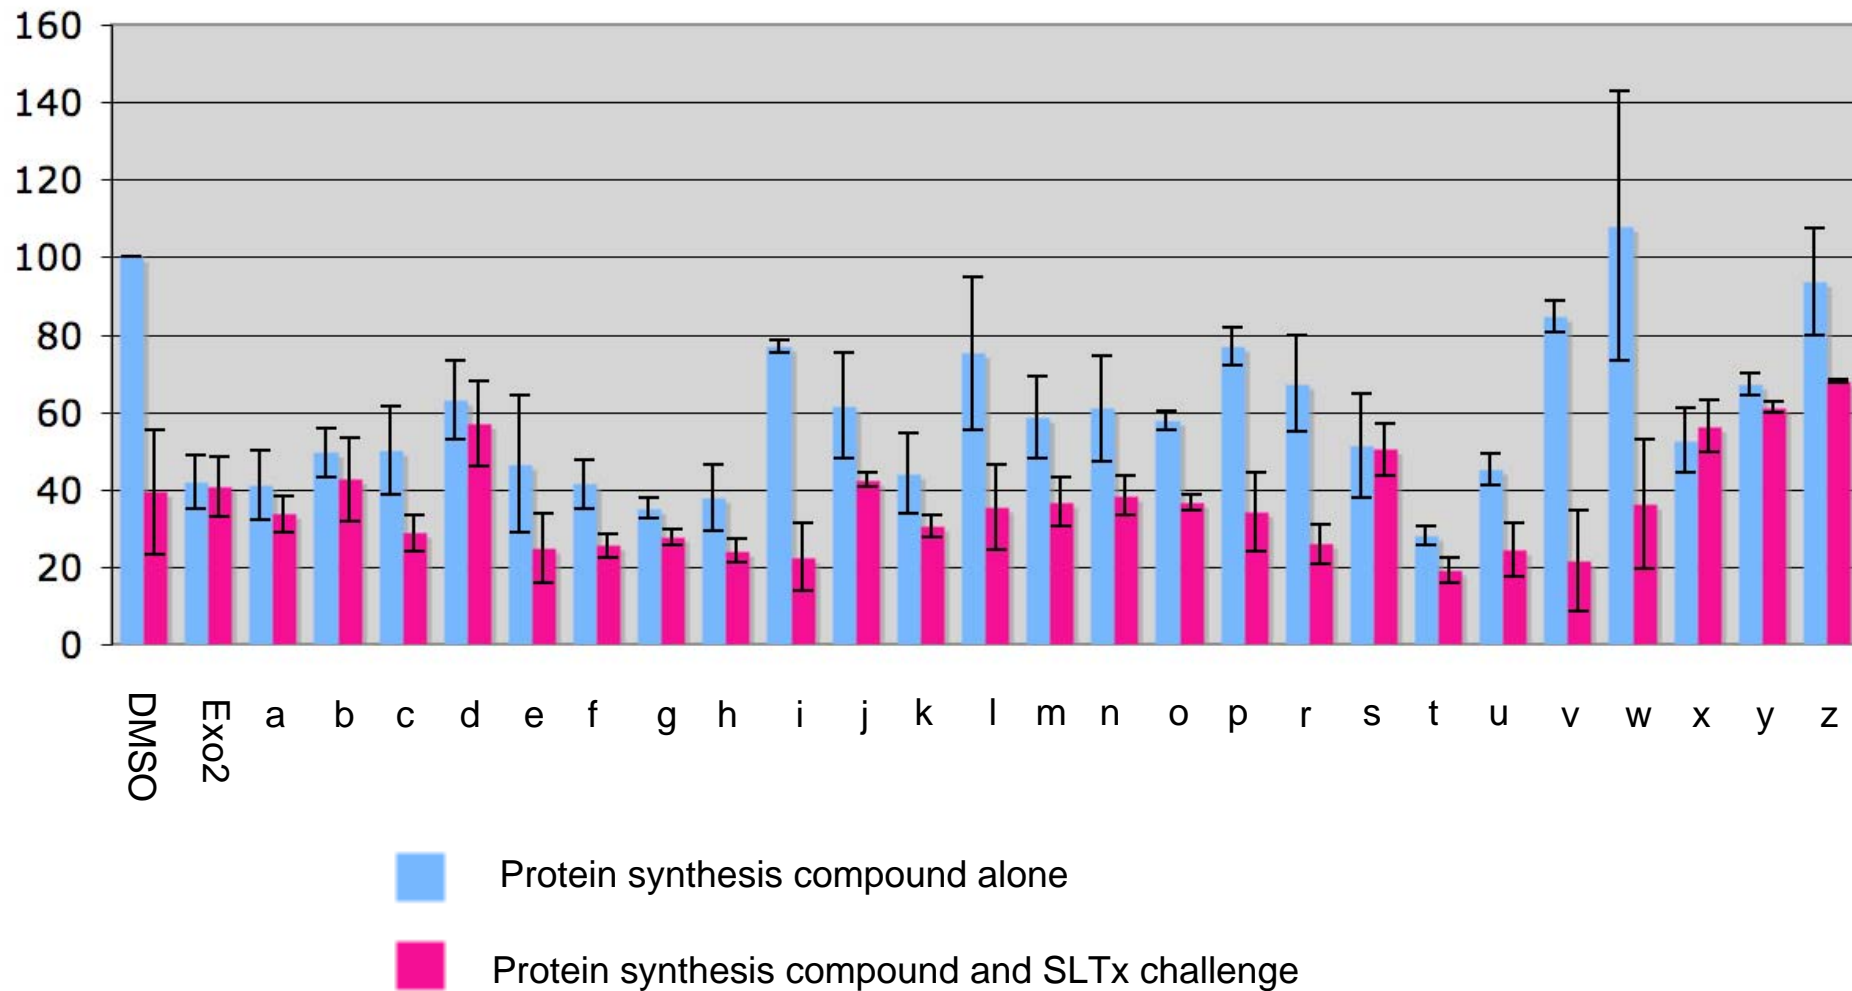

Supplement: c0mb00035c-pics.pdf [file c0mb00035c-pics.pdf]
